# Supplementary material for: Structural elucidation of the degradation mechanism of nickel-rich layered cathodes during high-voltage cycling
Source: Royal Society of Chemistry journal article supplement (doi:10.1039/d0cc00327a), 2020-01-01
Supplement: d0cc00327a1.pdf [file d0cc00327a1.pdf]

## Supporting Information

### **Structural elucidation of degradation mechanism of nickel-rich layered cathodes during high-voltage cycling**

Jing Lai,<sup>a</sup> Jun Zhang,<sup>b</sup> Zuwei Li,<sup>a</sup> Yao Xiao,<sup>a</sup> Weibo Hua,<sup>\*c</sup> Zhenguo Wu,<sup>\*a</sup> Yanxiao Chen,<sup>a</sup> Yanjun Zhong,<sup>a</sup> Wei Xiang,<sup>d</sup> Xiaodong Guo<sup>a</sup>

<sup>a</sup>School of Chemical Engineering, Sichuan University, No. 24 South Section 1, Yihuan Road, Chengdu, 610065, PR China

<sup>b</sup>Ruyuan Dongyangguang Magnetic Materials Co., Ltd, Guangdong, Ruyuan, 512000, PR China

<sup>c</sup>Institute for Applied Materials (IAM), Karlsruhe Institute of Technology (KIT), Hermann-von-Helmholtz-Platz 1, 76344 Eggenstein-Leopoldshafen, Germany

<sup>d</sup>College of Materials and Chemistry & Chemical Engineering, Chengdu University of Technology, Chengdu, 610059, PR China.

## 1. EXPERIMENTAL SECTION

### 1.1 Material preparation

#### 1.1.1 Preparation of N85CM.

The precursor of N85CM is synthesis by sol-gel method. The detailed procedure has been reported before.<sup>18-22</sup> Stoichiometric amounts of  $\text{Ni}(\text{CH}_3\text{COO})_2 \cdot 4\text{H}_2\text{O}$  (98%, Chron Chem),  $\text{Co}(\text{CH}_3\text{COO})_2 \cdot 6\text{H}_2\text{O}$  (99.5%, Chron Chem), and  $\text{Mn}(\text{CH}_3\text{COO})_2 \cdot 4\text{H}_2\text{O}$  (99%, Chron Chem) were dissolved in citric acid monohydrate (99.5%, Chron Chem) solution to achieve Ni: Co: Mn molar ratio of 85:10:5, and the molar ratio of citric acid to total metal ions was 1:1. The mixture was stirred for 3 h at 30°C, then stirred at 95°C until a viscous gel was obtained. The resulting sol-gel material was vacuum-dried for 5 h at 120°C and subsequently heat to 500°C for 5 h under oxygen atmosphere to remove acetate and citric acid. The obtained precursor was ground with  $\text{LiOH} \cdot \text{H}_2\text{O}$  (lithium excess 10%), and calcined at 500°C for 5 h and then at 780°C for 15 h under oxygen atmosphere.

#### 1.1.2 Preparation of N85CMA.

To achieve citric acid solution with  $\text{Ni}(\text{CH}_3\text{COO})_2 \cdot 4\text{H}_2\text{O}$  (98%, Chron Chem),  $\text{Co}(\text{CH}_3\text{COO})_2 \cdot 6\text{H}_2\text{O}$  (99.5%, Chron Chem),  $\text{Mn}(\text{CH}_3\text{COO})_2 \cdot 4\text{H}_2\text{O}$  (99%, Chron Chem) and  $\text{Al}(\text{CH}_3\text{COO})_3 \cdot 18\text{H}_2\text{O}$  (99%, Chron Chem) at a molar ratio of 85:10:3:2. Then the followed steps are the same as described above. For comparison, the traditional  $\text{LiCoO}_2$  cathode was also prepared by high-temperature solid-state reaction.

### 1.2. Material Characterization

The crystalline structural evolution of N85CM and N85CMA was characterized by high-resolution synchrotron radiation diffraction (SRD). *In situ* SRD experiments were performed at the beamline MSPD at ALBA (Barcelona, Spain), using synchrotron radiation with an energy of 30 keV ( $\lambda = 0.41287 \text{ \AA}$ ) and an exposure time of 60 seconds per pattern. The diffraction patterns were collected using a MYTHEN 1D position sensitive detector. For *in-situ* diffraction measurements, CR2025 coin cells with glass windows (diameter = 5 mm) were used. The unit cell parameters of N85CM and N85CMA were refined to the SRD patterns using Fullprof software. The refinements were performed by using a single  $\alpha\text{-NaFeO}_2$  layered structure model where Li ions and transition metals (TMs) are positioned on 3*b* site and 3*a* site, respectively, and oxygen ions are situated on 6*c* site. Then, the structures of N85CM and N85CMA cathodes were refined precisely against SRD

diffraction data with a single structural model with constrained structural parameters. Particle morphology and structure were measured by scanning electron microscopy (SEM, Hitachi, S-4800). The element mapping is performed by energy dispersive spectroscopy (EDS) using the same instrument with the SEM characterization. The cross-sectional SEM images were detected by FIB (HELIOS NanoLab 600i, FEI, USA).

### **1.3. Electrochemical measurements**

The positive electrode of the battery is composed of 80 wt.% positive electrode material, 13 wt.% acetylene black, 7 wt.% PVDF (polyvinylidene fluoride), and moderate amount of NMP (N-methyl-2-pyrrolidone). The mixture was ball milled for 16 minutes and then spread into a uniform film on an Al foil, subsequently vacuum-dried for 12 h at 120°C to remove NMP. The loading mass of the positive material in the electrode was  $4 \pm 0.5 \text{ mg cm}^{-2}$ . The coin cells were assembled with positive electrode, separator (Celgard 2400), lithium plate and electrolyte (1M LiPF<sub>6</sub> dissolved in ethylene carbonate and dimethyl carbonate (1:1 vol)) using CR2025 cases in glove box. The coin cells were tested at a current density of 0.1 C (1 C = 270 mA·g<sup>-1</sup>) between 2.7 and 4.8 V (versus Li/Li<sup>+</sup>).

## 2. Additional results and discussion

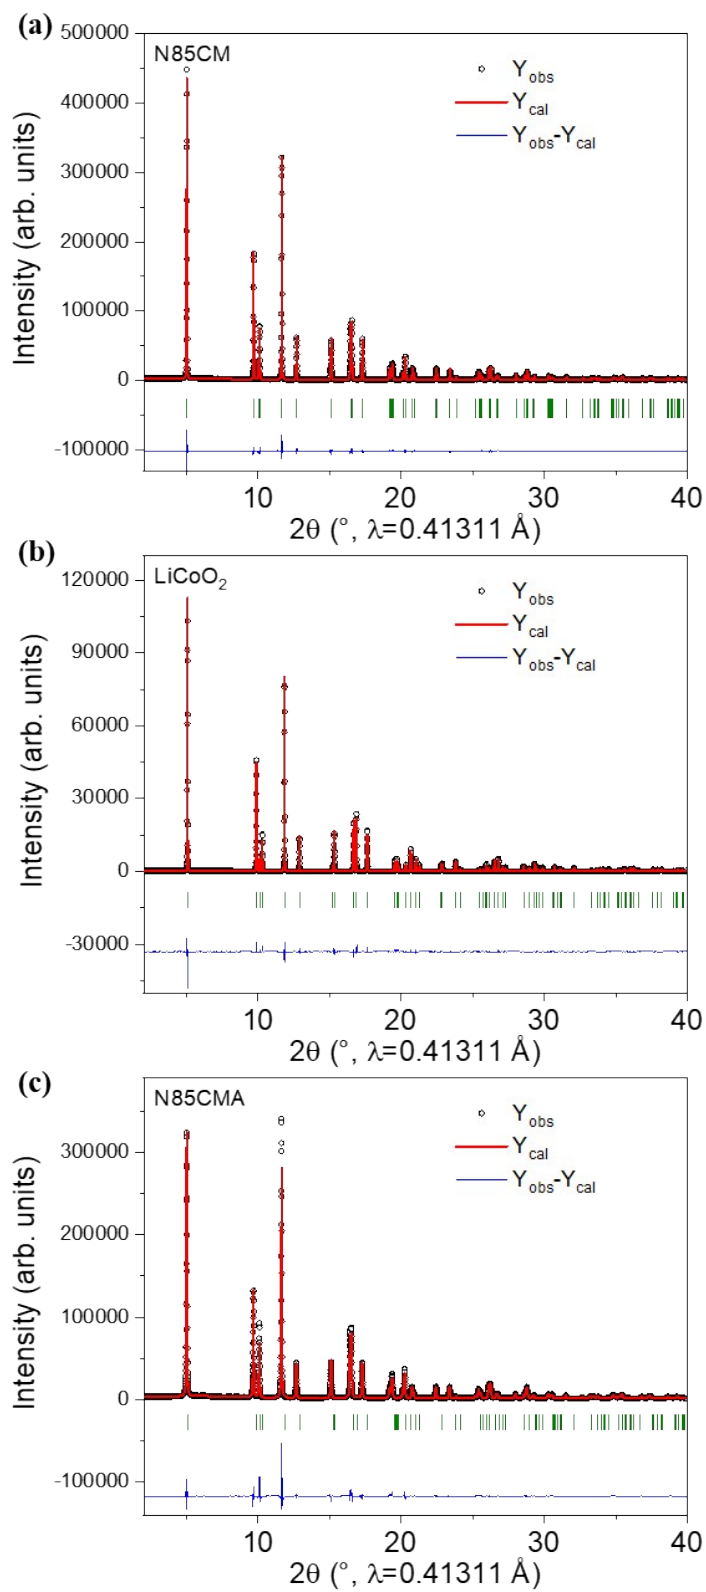

Figure S1. Rietveld refinement against SRD patterns of (a) N85CM, (b) LiCoO<sub>2</sub> and (c) N85CMA.

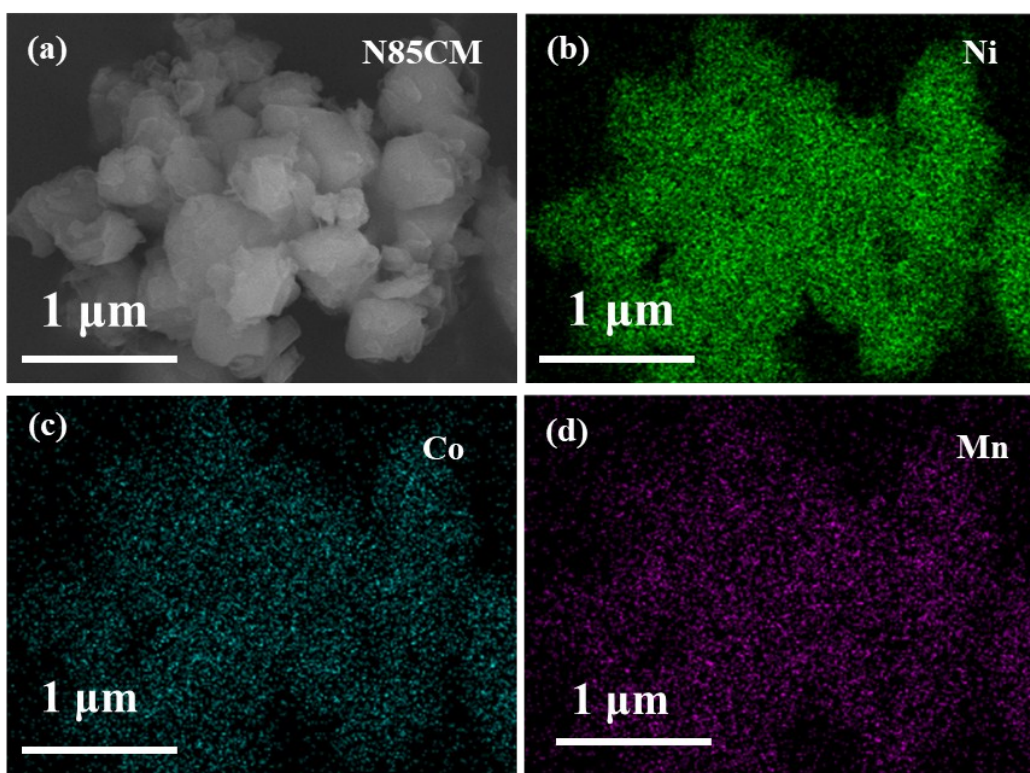

Figure S2. (a) SEM image and (b-d) EDS mappings of N85CM.

The SEM images of the as-prepared N85CM cathode material (Fig. S2a) exhibit that the secondary particles are formed by agglomeration of primary particles, and the EDS mappings (Fig. S2b, c and d) reveal the uniform distributions of TMs.

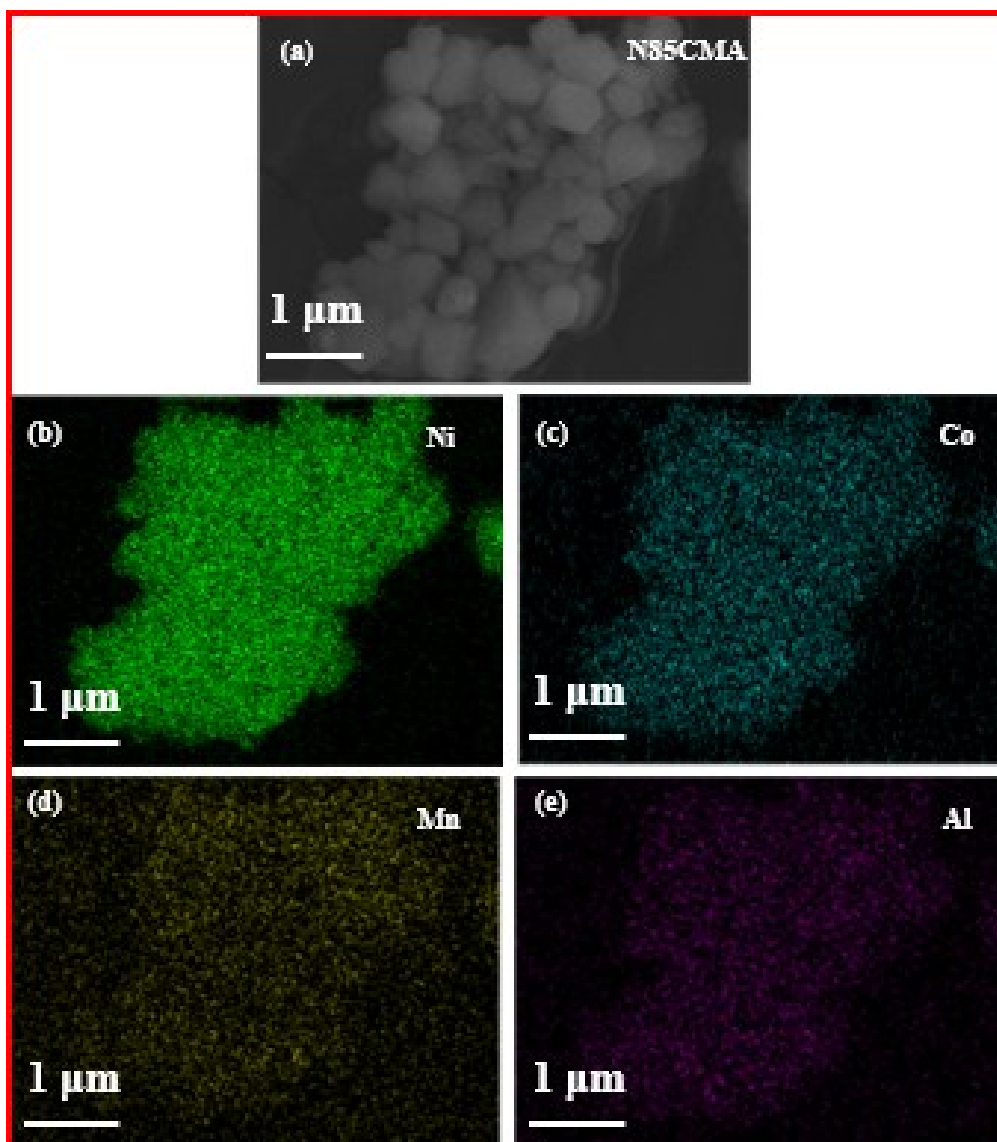

Figure S3. (a) SEM image and (b-e) EDS mappings of N85CMA.

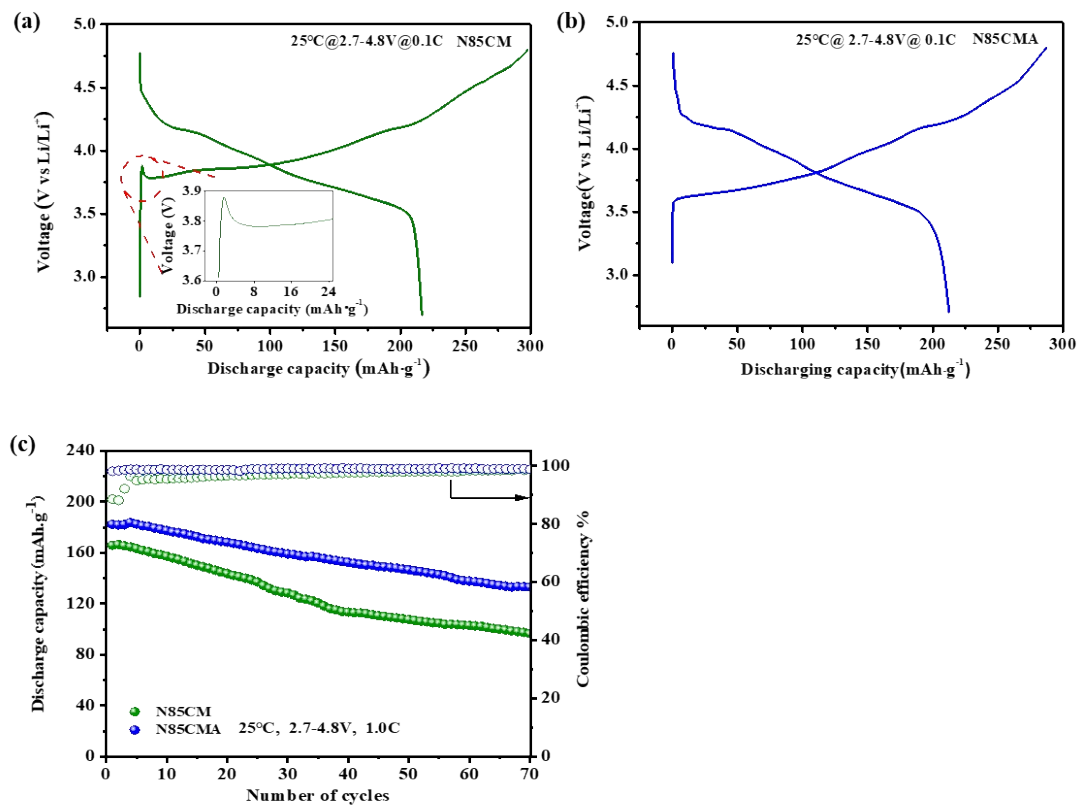

Figure S4. Voltage profiles for first cycle of (a) N85CM and (b) at a voltage range of 2.7-4.8 V. Cycling performances of N85CM and N85CMA with voltage range of 2.7-4.8V at 1.0 C and 25°C are also shown in (c).

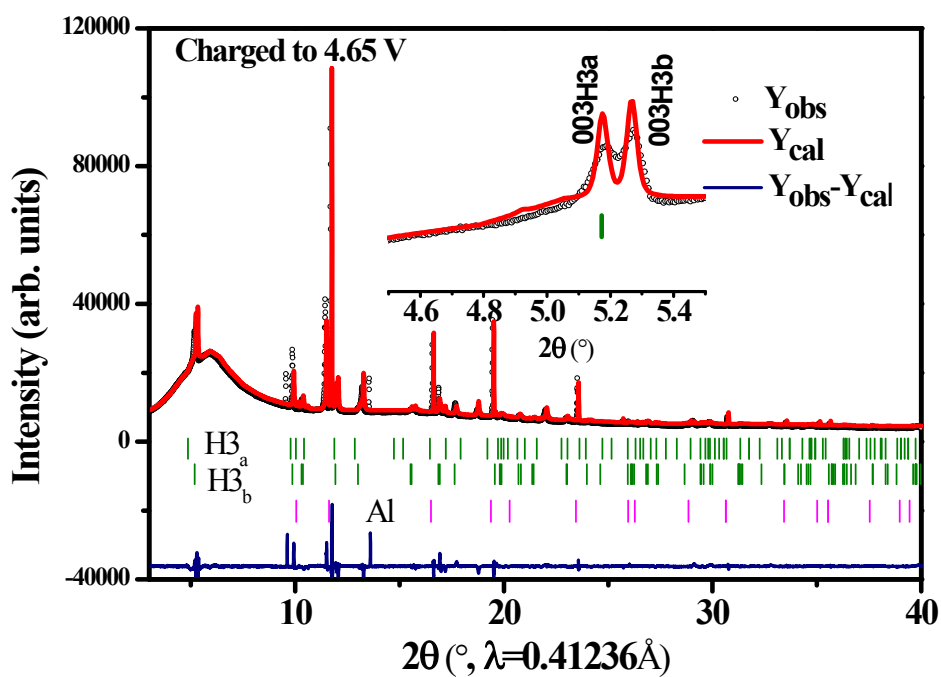

Figure S5. Rietveld refinement results of H3<sub>a</sub>-H3<sub>b</sub> biphasic region at 4.65 V of N85CM are exhibited in Figure 1(a-b).

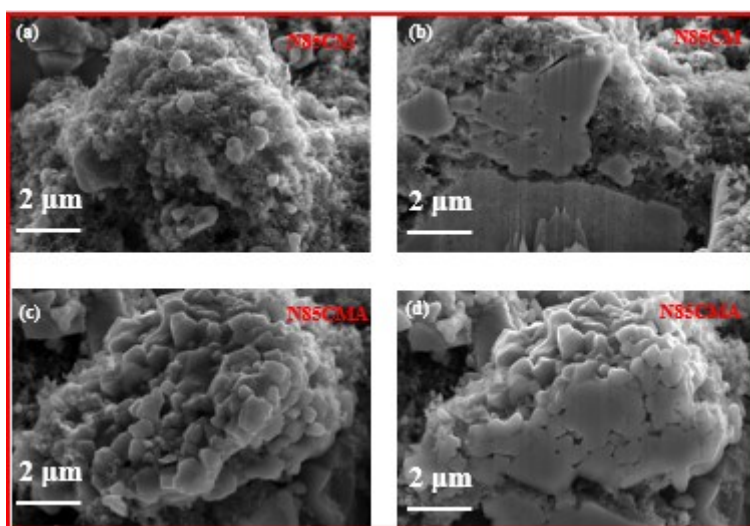

Figure S6. SEM image of (a) N85CM and (c) N85CMA after cycles. Cross-section images of the fully discharged cathodes after 100 cycles: (b) N85CM and (d) N85CMA.
